# Supplementary material for: An Li-rich oxide cathode material with mosaic spinel grain and a surface coating for high performance Li-ion batteries
Source: Royal Society of Chemistry journal article supplement (doi:10.1039/c4ta02947j), 2014-07-29
Supplement: c4ta02947j1.pdf [file c4ta02947j1.pdf]

Electronic Supplementary Material (ESI) for Journal of Materials Chemistry A  
This journal is © The Royal Society of Chemistry 2014

## Supporting Information

### A Li-Rich Oxide Cathode Material with Mosaic Spinel Grain and Surface Coating for High Performance Li-Ion Batteries

Hui Liu,<sup>a</sup> Chunyu Du,<sup>a\*</sup> Geping Yin,<sup>a</sup> Bai Song,<sup>b</sup> Pengjian Zuo,<sup>a</sup> Xinqun Cheng,<sup>a</sup> Yulin Ma<sup>a</sup>  
and Yunzhi Gao<sup>a</sup>

<sup>a</sup> School of Chemical Engineering and Technology, Harbin Institute of Technology  
Harbin, 150001, China. E-mail: [cydu@hit.edu.cn](mailto:cydu@hit.edu.cn)  
<sup>b</sup> Harbin Coslight Power Co., Ltd., No.8 Taihu South Street, Harbin, 150060, China.

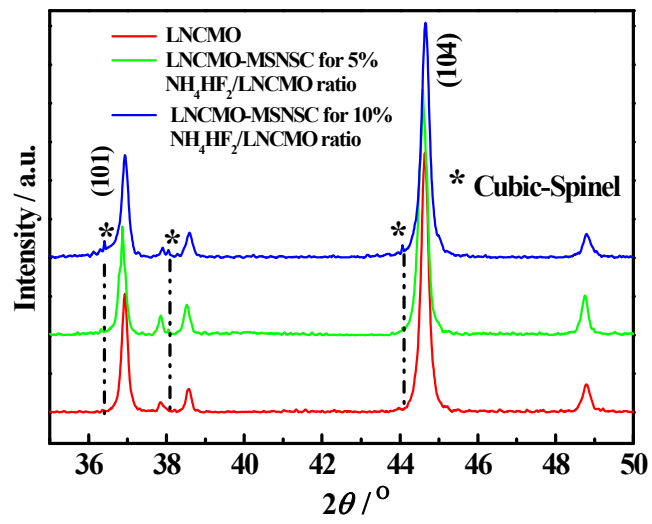

**Figure S1.** Powder XRD patterns of the LNCMO and LNCMO-MSNSC materials in 35°-50° region.

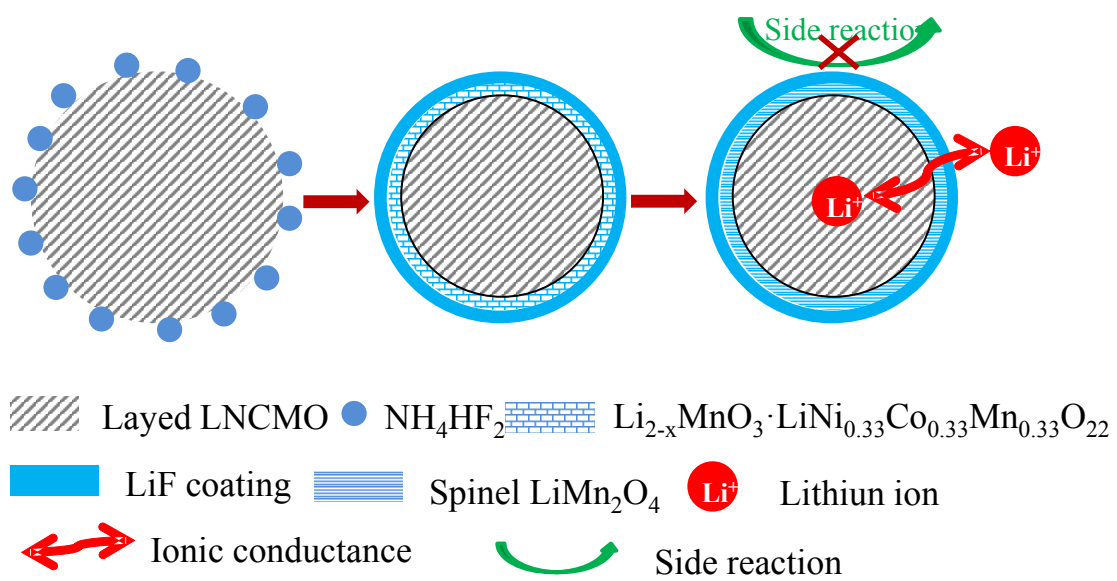

**Figure S2.** Schematic diagram of layer-to-spinel phase transformation during the surface modification and beneficial effects of LiF coating and Spinel

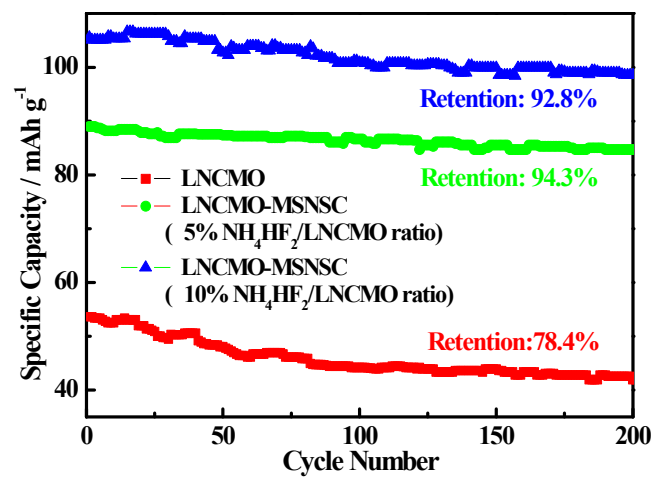

**Figure S3.** Cycling performance of the LNCMO and LNCMO-MSNSC electrodes between 2.0 V and 4.6 V at a current density of 1000 mA g<sup>-1</sup>.

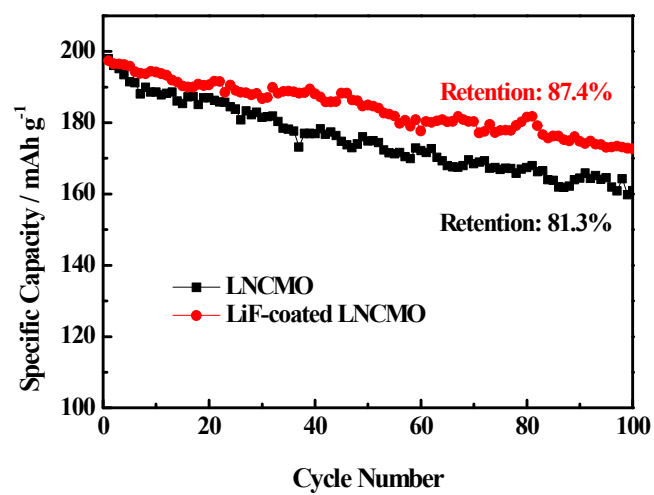

**Figure S4.** Cycling performance of the LNCMO and LiF-coated LNCMO electrodes between 2.0 V and 4.6 V at a current density of 30 mA g<sup>-1</sup>.

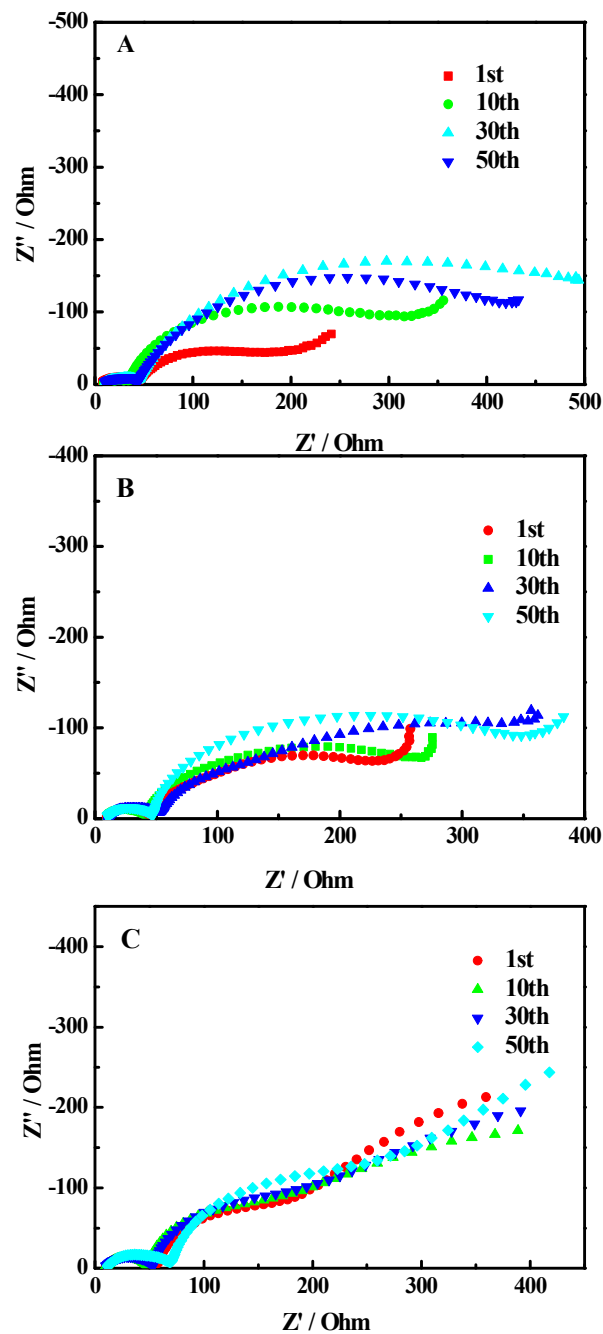

**Figure S5.** Nyquist plots of (A) LNCMO, (B) LNCMO-MSNSC for 5%  $\text{NH}_4\text{HF}_2/\text{LNCMO}$  ratio, and (C) LNCMO-MSNSC for 10%  $\text{NH}_4\text{HF}_2/\text{LNCMO}$  ratio electrodes at 4.3 V.
